# Supplementary material for: Efficacy and safety of selective TYK2 inhibitor, deucravacitinib, in a phase II trial in psoriatic arthritis
Source: HighWire-hosted journal article supplement (doi:10.1136/annrheumdis-2021-221664), 2022-03-03
Supplement: annrheumdis-2021-221664supp001_data_supplement.pdf [file annrheumdis-2021-221664supp001_data_supplement.pdf]

**Supplemental Figure S1. Study Design**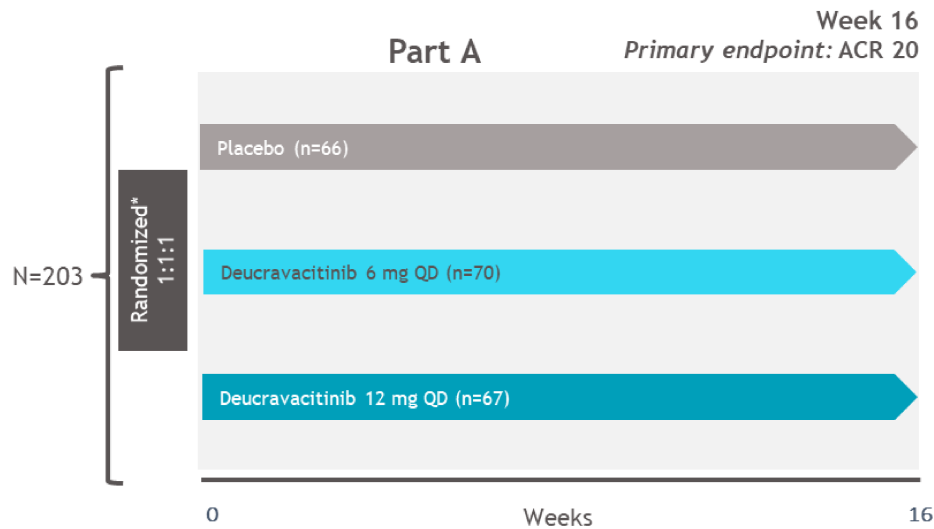

\*Patients who completed the 16 weeks of double-blind treatment (Part A) were eligible for participation in an optional blinded long-term 36-week extension trial with active treatment (Part B).

ACR, American College of Rheumatology; QD, once daily.
