# Supplementary material for: Efficacy and safety of selective TYK2 inhibitor, deucravacitinib, in a phase II trial in psoriatic arthritis
Source: PubMed Central journal article supplement (PMC9120409; doi:10.1136/annrheumdis-2021-221664), 2022-03-03
Supplement: annrheumdis-2021-221664supp003.pdf [file annrheumdis-2021-221664supp003.pdf]

## Supplemental Figure S2. Patient Disposition

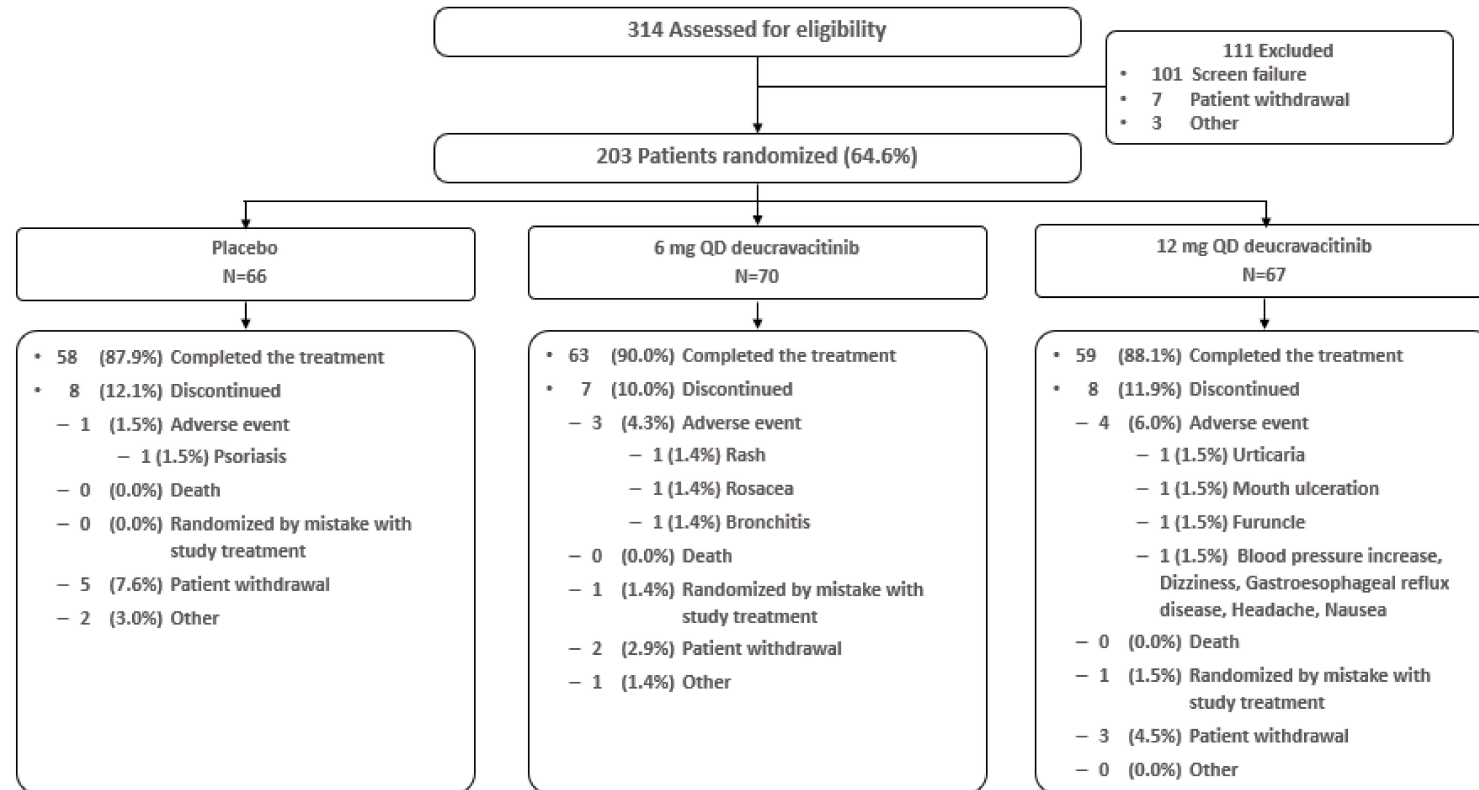

QD, once daily.
