# Supplementary material for: Efficacy and safety of selective TYK2 inhibitor, deucravacitinib, in a phase II trial in psoriatic arthritis
Source: PubMed Central journal article supplement (PMC9120409; doi:10.1136/annrheumdis-2021-221664), 2022-03-03
Supplement: annrheumdis-2021-221664supp004.pdf [file annrheumdis-2021-221664supp004.pdf]

Supplemental Figure S3. ACR 20 Response at Week 16 – Effects of TNFi Experience, Body Weight, and Gender

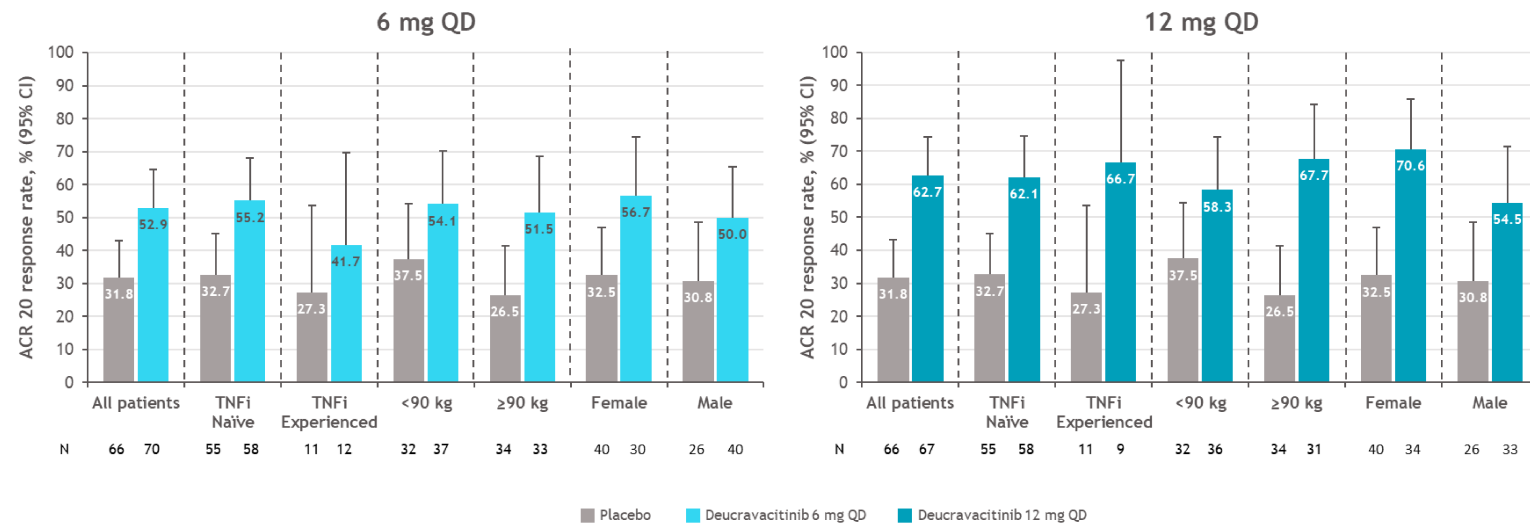

ACR, American College of Rheumatology; CI, confidence interval; QD, once daily; TNFi, tumor necrosis factor inhibitor.
