# Supplementary material for: Efficacy and safety of selective TYK2 inhibitor, deucravacitinib, in a phase II trial in psoriatic arthritis
Source: PubMed Central journal article supplement (PMC9120409; doi:10.1136/annrheumdis-2021-221664), 2022-03-03
Supplement: annrheumdis-2021-221664supp005.pdf [file annrheumdis-2021-221664supp005.pdf]

**Supplemental Table S1. ACR Components at Week 16**

| Component                                      | Deucravacitinib |                 |                  |
|------------------------------------------------|-----------------|-----------------|------------------|
|                                                | Placebo<br>n=66 | 6 mg QD<br>n=70 | 12 mg QD<br>n=67 |
| Tender joint count                             |                 |                 |                  |
| Baseline, mean (SD)                            | 16.9 (9.8)      | 18.1 (10.3)     | 19.4 (11.8)      |
| Change from baseline, mean (SD) <sup>a</sup>   | -4.6 (9.7)      | -9.3 (9.7)      | -12.2 (10.2)     |
| % change from baseline, mean (SD) <sup>a</sup> | -25.9 (51.2)    | -49.0 (51.9)    | -60.4 (35.9)     |
| Swollen joint count                            |                 |                 |                  |
| Baseline, mean (SD)                            | 10.5 (7.7)      | 11.9 (7.0)      | 11.3 (9.0)       |
| Change from baseline, mean (SD) <sup>a</sup>   | -4.3 (8.0)      | -7.7 (5.8)      | -8.5 (9.1)       |
| % change from baseline, mean (SD) <sup>a</sup> | -39.8 (63.3)    | -68.4 (33.1)    | -67.7 (44.1)     |
| Patient Global Assessment of disease activity  |                 |                 |                  |
| Baseline, mean (SD)                            | 66.2 (15.8)     | 68.2 (16.8)     | 63.6 (15.6)      |
| Change from baseline, mean (SD) <sup>a</sup>   | -13.4 (23.5)    | -28.7 (23.1)    | -27.6 (25.8)     |
| % change from baseline, mean (SD) <sup>a</sup> | -18.1 (37.9)    | -43.0 (34.0)    | -40.4 (49.2)     |

|                                                 |              |              |              |
|-------------------------------------------------|--------------|--------------|--------------|
| Patient Global Assessment of pain               |              |              |              |
| Baseline, mean (SD)                             | 64.9 (18.2)  | 63.6 (21.7)  | 63.8 (15.9)  |
| Change from baseline, mean (SD) <sup>a</sup>    | -13.8 (21.5) | -25.3 (26.1) | -27.5 (25.0) |
| % change from baseline, mean (SD) <sup>b</sup>  | -20.2 (35.0) | -36.9 (39.1) | -42.0 (37.3) |
| Physician Global Assessment of disease activity |              |              |              |
| Baseline, mean (SD)                             | 63.8 (14.8)  | 68.2 (14.7)  | 63.3 (16.1)  |
| Change from baseline, mean (SD) <sup>c</sup>    | -19.9 (21.8) | -33.6 (23.0) | -32.2 (25.0) |
| % change from baseline, mean (SD) <sup>c</sup>  | -29.2 (34.7) | -49.1 (32.1) | -47.7 (35.2) |
| HAQ-DI total score                              |              |              |              |
| Baseline, mean (SD)                             | 1.3 (0.6)    | 1.3 (0.6)    | 1.3 (0.6)    |
| Change from baseline, mean (SD) <sup>a</sup>    | -0.1 (0.4)   | -0.4 (0.5)   | -0.4 (0.6)   |
| % change from baseline, mean (SD) <sup>d</sup>  | -10.6 (31.2) | -36.0 (39.0) | -30.8 (52.6) |
| High-sensitivity C-reactive protein             |              |              |              |
| Baseline, mean (SD)                             | 20.4 (39.1)  | 17.6 (23.6)  | 16.5 (21.7)  |
| Change from baseline, mean (SD) <sup>e</sup>    | -3.3 (22.6)  | -14.2 (24.5) | -10.9 (22.8) |
| % change from baseline, mean (SD) <sup>e</sup>  | 36.0 (221.3) | -40.0 (54.0) | -9.1 (144.0) |

All calculations were performed on individual patient data. Change from baseline = Week 16 value – baseline value.

% change from baseline = ((week 16 value – baseline value)\*100)/baseline value.

ACR, American College of Rheumatology; HAQ-DI, Health Assessment Questionnaire-Disability Index; QD, once daily;

SD, standard deviation.

<sup>a</sup>Calculated for patients with valid Week 16 data (placebo, n=58; 6 mg QD, n=63; 12 mg QD, n=60).

<sup>b</sup>Calculated for patients with valid Week 16 data (placebo, n=58; 6 mg QD, n=62; 12 mg QD, n=60).

<sup>c</sup>Calculated for patients with valid Week 16 data (placebo, n=57; 6 mg QD, n=63; 12 mg QD, n=59).

<sup>d</sup>Calculated for patients with valid Week 16 data (placebo, n=58; 6 mg QD, n=62; 12 mg QD, n=59).

<sup>e</sup>Calculated for patients with valid Week 16 data (placebo, n=57; 6 mg QD, n=62; 12 mg QD, n=60).
