# Supplementary material for: Efficacy and safety of selective TYK2 inhibitor, deucravacitinib, in a phase II trial in psoriatic arthritis
Source: HighWire-hosted journal article supplement (doi:10.1136/annrheumdis-2021-221664), 2022-03-03
Supplement: annrheumdis-2021-221664supp006_data_supplement.pdf [file annrheumdis-2021-221664supp006_data_supplement.pdf]

**Supplemental Table S2. Laboratory Parameters (Mean [SD]) at Baseline and****Week 16**

| Laboratory Parameter                   | Placebo       | Deucravacitinib<br>6 mg QD | Deucravacitinib<br>12 mg QD |
|----------------------------------------|---------------|----------------------------|-----------------------------|
| Lymphocyte counts (10 <sup>9</sup> /L) |               |                            |                             |
| Baseline                               | 1.8 (0.6)     | 1.7 (0.6)                  | 1.8 (0.6)                   |
| Week 16                                | 1.7 (0.6)     | 1.8 (0.6)                  | 1.9 (0.6)                   |
| Neutrophil counts (10 <sup>9</sup> /L) |               |                            |                             |
| Baseline                               | 5.1 (2.3)     | 4.7 (1.6)                  | 5.0 (1.6)                   |
| Week 16                                | 4.8 (2.6)     | 4.1 (1.4)                  | 4.8 (1.5)                   |
| Platelet counts (10 <sup>9</sup> /L)   |               |                            |                             |
| Baseline                               | 291.9 (126.8) | 269.2 (65.6)               | 273.1 (80.8)                |
| Week 16                                | 279.0 (101.0) | 256.2 (52.4)               | 256.7 (77.5)                |
| Hemoglobin (g/dL)                      |               |                            |                             |
| Baseline                               | 13.3 (1.5)    | 13.9 (1.6)                 | 13.7 (1.5)                  |
| Week 16                                | 13.5 (1.3)    | 14.1 (1.6)                 | 14.0 (1.5)                  |
| Total cholesterol (mg/dL)              |               |                            |                             |
| Baseline                               | 192.8 (39.6)  | 193.6 (40.9)               | 187.3 (32.7)                |
| Week 16                                | 196.6 (40.9)  | 203.6 (50.6)               | 194.2 (36.2)                |
| Triglyceride (mg/dL)                   |               |                            |                             |
| Baseline                               | 134.7 (57.2)  | 167.3 (226.1)              | 169.7 (102.2)               |
| Week 16                                | 135.8 (71.1)  | 163.8 (121.1)              | 189.5 (127.5)               |
| ALT (U/L)                              |               |                            |                             |
| Baseline                               | 22.8 (15.2)   | 24.9 (18.4)                | 23.9 (12.6)                 |
| Week 16                                | 26.6 (22.5)   | 25.2 (14.0)                | 27.5 (18.3)                 |
| AST (U/L)                              |               |                            |                             |
| Baseline                               | 18.6 (6.1)    | 22.4 (12.9)                | 21.7 (9.0)                  |
| Week 16                                | 21.8 (10.3)   | 22.1 (8.7)                 | 26.6 (32.7)                 |
| CPK (U/L)                              |               |                            |                             |
| Baseline                               | 84.8 (59.0)   | 106.6 (107.9)              | 103.4 (89.9)                |
| Week 16                                | 91.1 (51.4)   | 115.3 (97.6)               | 488.6 (2785.8) <sup>a</sup> |
| Creatinine (mg/dL)                     |               |                            |                             |
| Baseline                               | 0.75 (0.16)   | 0.82 (0.18)                | 0.79 (0.17)                 |
| Week 16                                | 0.78 (0.17)   | 0.84 (0.17)                | 0.80 (0.17)                 |

<sup>a</sup>One patient in the deucravacitinib 12 mg QD group had a CPK increase (21,690 U/L)

on Day 113 following a period of intense physical exercise in the previous week. This was considered as a severe AE not related to study drug. Study drug was interrupted due to this event. The patient stopped physical exercise, and the event resolved on Day 119 without treatment.

AE, adverse event; ALT, alanine aminotransferase; AST, aspartate aminotransferase;

CPK, creatine phosphokinase; QD, daily; SD, standard deviation.
