# Supplementary material for: Efficacy and safety of selective TYK2 inhibitor, deucravacitinib, in a phase II trial in psoriatic arthritis
Source: HighWire-hosted journal article supplement (doi:10.1136/annrheumdis-2021-221664), 2022-03-03
Supplement: annrheumdis-2021-221664supp008_data_supplement.pdf [file annrheumdis-2021-221664supp008_data_supplement.pdf]

**Supplemental Table S4. ACR 20 Response Rate and HAQ-DI Adjusted Mean****Change From Baseline Over 16 Weeks**

| <b>Endpoint</b>                         | <b>Placebo<br/>(N=66)</b> | <b>Deucravacitinib<br/>6 mg QD (N=70)</b> | <b>Deucravacitinib<br/>12 mg QD (N=67)</b> |
|-----------------------------------------|---------------------------|-------------------------------------------|--------------------------------------------|
| <b>ACR 20 response rate<sup>a</sup></b> |                           |                                           |                                            |
| Week 1 responders, n/N                  | 2/66                      | 8/70                                      | 5/67                                       |
| Response rate, %<br>(95% CI)            | 3.0 (0.0, 7.2)            | 11.4 (4.0, 18.9)                          | 7.5 (1.2, 13.8)                            |
| <i>P</i> -value vs placebo              |                           | 0.0631                                    | 0.2657                                     |
| Week 2 responders, n/N                  | 14/66                     | 11/70                                     | 17/67                                      |
| Response rate, %<br>(95% CI)            | 21.2 (11.3, 31.1)         | 15.7 (7.2, 24.2)                          | 25.4 (15.0, 35.8)                          |
| <i>P</i> -value vs placebo              |                           | 0.3889                                    | 0.5301                                     |
| Week 4 responders, n/N                  | 20/66                     | 20/70                                     | 20/67                                      |
| Response rate, %<br>(95% CI)            | 30.3 (19.2, 41.4)         | 28.6 (18.0, 39.2)                         | 29.9 (18.9, 40.8)                          |
| <i>P</i> -value vs placebo              |                           | 0.8007                                    | 0.9763                                     |
| Week 8 responders, n/N                  | 21/66                     | 33/70                                     | 36/67                                      |
| Response rate, %<br>(95% CI)            | 31.8 (20.6, 43.1)         | 47.1 (35.4, 58.8)                         | 53.7 (41.8, 65.7)                          |
| <i>P</i> -value vs placebo              |                           | 0.0731                                    | 0.0108                                     |
| Week 12 responders, n/N                 | 23/66                     | 43/70                                     | 41/67                                      |

|                                                           |                      |                      |                      |
|-----------------------------------------------------------|----------------------|----------------------|----------------------|
| Response rate, %<br>(95% CI)                              | 34.8 (23.4, 46.3)    | 61.4 (50.0, 72.8)    | 61.2 (49.5, 72.9)    |
| <i>P</i> -value vs placebo                                |                      | 0.0021               | 0.0021               |
| Week 16 responders, n/N                                   | 21/66                | 37/70                | 42/67                |
| Response rate, %<br>(95% CI)                              | 31.8 (20.6, 43.1)    | 52.9 (41.2, 64.6)    | 62.7 (51.1, 74.3)    |
| <i>P</i> -value vs placebo                                |                      | 0.0134               | 0.0004               |
| HAQ-DI adjusted mean<br>change from baseline <sup>b</sup> |                      |                      |                      |
| Week 1, mean (95% CI)                                     | -0.04 (-0.12, 0.05)  | -0.12 (-0.21, -0.04) | -0.11 (-0.19, -0.02) |
| <i>P</i> -value vs placebo                                |                      | 0.0985               | 0.1747               |
| Week 2, mean (95% CI)                                     | -0.15 (-0.25, -0.05) | -0.17 (-0.27, -0.08) | -0.24 (-0.34, -0.13) |
| <i>P</i> -value vs placebo                                |                      | 0.6593               | 0.1657               |
| Week 4, mean (95% CI)                                     | -0.08 (-0.19, 0.02)  | -0.22 (-0.32, -0.12) | -0.21 (-0.31, -0.10) |
| <i>P</i> -value vs placebo                                |                      | 0.0426               | 0.0677               |
| Week 8, mean (95% CI)                                     | -0.11 (-0.23, 0.02)  | -0.30 (-0.43, -0.18) | -0.39 (-0.52, -0.27) |
| <i>P</i> -value vs placebo                                |                      | 0.0155               | 0.0005               |
| Week 12, mean (95% CI)                                    | -0.15 (-0.28, -0.02) | -0.37 (-0.49, -0.24) | -0.42 (-0.55, -0.29) |
| <i>P</i> -value vs placebo                                |                      | 0.0073               | 0.0010               |
| Week 16, mean (95% CI)                                    | -0.11 (-0.24, 0.02)  | -0.37 (-0.50, -0.24) | -0.39 (-0.53, -0.26) |
| <i>P</i> -value vs placebo                                |                      | 0.0020               | 0.0008               |

<sup>a</sup>Missing data were imputed as nonresponders.

<sup>b</sup>Modified baseline observation carried forward was used to handle missing data.

ACR, American College of Rheumatology; CI, confidence interval; HAQ-DI, Health Assessment Questionnaire-Disability Index; QD, daily.
