# Supplementary material for: Efficacy and safety of selective TYK2 inhibitor, deucravacitinib, in a phase II trial in psoriatic arthritis
Source: PubMed Central journal article supplement (PMC9120409; doi:10.1136/annrheumdis-2021-221664), 2022-03-03
Supplement: annrheumdis-2021-221664supp009.pdf [file annrheumdis-2021-221664supp009.pdf]

**Supplemental Table S5. Mean Laboratory Parameter Values Over 16****Weeks**

| Laboratory<br>Parameter                        | Placebo                                        | Deucravacitinib<br>6 mg QD | Deucravacitinib<br>12 mg QD |
|------------------------------------------------|------------------------------------------------|----------------------------|-----------------------------|
|                                                | <b>Lymphocytes, 10<sup>9</sup><br/>cells/L</b> |                            |                             |
| Baseline, n                                    | 66                                             | 70                         | 67                          |
| Mean (SD)                                      | 1.8 (0.6)                                      | 1.7 (0.6)                  | 1.8 (0.6)                   |
| Week 1, n                                      | 60                                             | 70                         | 60                          |
| Mean (SD)                                      | 1.8 (0.6)                                      | 1.8 (0.6)                  | 1.9 (0.6)                   |
| Week 2, n                                      | 60                                             | 62                         | 59                          |
| Mean (SD)                                      | 1.8 (0.6)                                      | 1.8 (0.6)                  | 1.8 (0.7)                   |
| Week 4, n                                      | 62                                             | 65                         | 62                          |
| Mean (SD)                                      | 1.8 (0.7)                                      | 1.8 (0.6)                  | 1.8 (0.6)                   |
| Week 8, n                                      | 59                                             | 61                         | 58                          |
| Mean (SD)                                      | 1.8 (0.6)                                      | 1.8 (0.6)                  | 1.9 (0.7)                   |
| Week 12, n                                     | 59                                             | 63                         | 62                          |
| Mean (SD)                                      | 2.0 (0.8)                                      | 1.9 (0.6)                  | 2.0 (0.6)                   |
| Week 16, n                                     | 54                                             | 61                         | 59                          |
| Mean (SD)                                      | 1.7 (0.6)                                      | 1.8 (0.6)                  | 1.9 (0.6)                   |
| <b>Neutrophils, 10<sup>9</sup><br/>cells/L</b> |                                                |                            |                             |
| Baseline, n                                    | 66                                             | 70                         | 67                          |
| Mean (SD)                                      | 5.1 (2.3)                                      | 4.7 (1.6)                  | 5.0 (1.6)                   |

|                                          |               |              |              |
|------------------------------------------|---------------|--------------|--------------|
| Week 1, n                                | 60            | 70           | 60           |
| Mean (SD)                                | 4.7 (1.9)     | 4.6 (1.6)    | 5.3 (1.6)    |
| Week 2, n                                | 60            | 62           | 59           |
| Mean (SD)                                | 4.8 (2.3)     | 4.4 (1.5)    | 5.2 (1.6)    |
| Week 4, n                                | 62            | 65           | 62           |
| Mean (SD)                                | 5.0 (2.2)     | 4.3 (1.6)    | 5.3 (2.0)    |
| Week 8, n                                | 59            | 61           | 58           |
| Mean (SD)                                | 4.8 (1.8)     | 4.3 (1.7)    | 5.0 (1.9)    |
| Week 12, n                               | 59            | 63           | 62           |
| Mean (SD)                                | 4.8 (1.8)     | 4.2 (1.5)    | 4.8 (1.5)    |
| Week 16, n                               | 54            | 61           | 59           |
| Mean (SD)                                | 4.8 (2.6)     | 4.1 (1.4)    | 4.8 (1.5)    |
| <b>Platelets, 10<sup>9</sup> cells/L</b> |               |              |              |
| Baseline, n                              | 66            | 70           | 67           |
| Mean (SD)                                | 291.9 (126.8) | 269.2 (65.6) | 273.1 (80.8) |
| Week 1, n                                | 62            | 70           | 61           |
| Mean (SD)                                | 283.9 (105.2) | 279.5 (66.6) | 270.0 (77.4) |
| Week 2, n                                | 62            | 63           | 61           |
| Mean (SD)                                | 288.1 (109.4) | 275.2 (74.6) | 277.9 (93.3) |
| Week 4, n                                | 62            | 65           | 62           |
| Mean (SD)                                | 275.9 (99.4)  | 270.5 (65.3) | 267.1 (86.6) |
| Week 8, n                                | 60            | 61           | 57           |
| Mean (SD)                                | 271.9 (72.1)  | 261.7 (61.7) | 265.5 (77.1) |
| Week 12, n                               | 58            | 64           | 62           |
| Mean (SD)                                | 292.5 (103.4) | 255.7 (59.3) | 262.4 (75.9) |

|                                 |               |              |              |
|---------------------------------|---------------|--------------|--------------|
| Week 16, n                      | 53            | 61           | 59           |
| Mean (SD)                       | 279.0 (101.0) | 256.2 (52.4) | 256.7 (77.5) |
| <b>Hemoglobin, g/dL</b>         |               |              |              |
| Baseline, n                     | 66            | 70           | 67           |
| Mean (SD)                       | 13.3 (1.5)    | 13.9 (1.6)   | 13.7 (1.5)   |
| Week 1, n                       | 63            | 70           | 61           |
| Mean (SD)                       | 13.3 (1.4)    | 13.7 (1.5)   | 13.6 (1.4)   |
| Week 2, n                       | 63            | 63           | 62           |
| Mean (SD)                       | 13.3 (1.5)    | 13.7 (1.6)   | 13.6 (1.5)   |
| Week 4, n                       | 63            | 65           | 62           |
| Mean (SD)                       | 13.3 (1.6)    | 13.8 (1.4)   | 13.5 (1.5)   |
| Week 8, n                       | 60            | 61           | 58           |
| Mean (SD)                       | 13.5 (1.4)    | 14.1 (1.6)   | 13.7 (1.4)   |
| Week 12, n                      | 59            | 64           | 62           |
| Mean (SD)                       | 13.3 (1.5)    | 14.0 (1.6)   | 13.9 (1.4)   |
| Week 16, n                      | 54            | 61           | 59           |
| Mean (SD)                       | 13.5 (1.3)    | 14.1 (1.6)   | 14.0 (1.5)   |
| <b>Total Cholesterol, mg/dL</b> |               |              |              |
| Baseline, n                     | 66            | 70           | 67           |
| Mean (SD)                       | 192.8 (39.6)  | 193.6 (40.9) | 187.3 (32.7) |
| Week 4, n                       | 64            | 66           | 62           |
| Mean (SD)                       | 188.3 (42.5)  | 199.7 (44.5) | 185.8 (29.2) |
| Week 16, n                      | 57            | 61           | 59           |
| Mean (SD)                       | 196.6 (40.9)  | 203.6 (50.6) | 194.2 (36.2) |

| Triglycerides, mg/dL |              |               |               |
|----------------------|--------------|---------------|---------------|
| Baseline, n          | 66           | 70            | 67            |
| Mean (SD)            | 134.7 (57.2) | 167.3 (226.1) | 169.7 (102.2) |
| Week 4, n            | 64           | 66            | 62            |
| Mean (SD)            | 136.9 (76.7) | 157.8 (144.0) | 169.3 (106.2) |
| Week 16, n           | 57           | 61            | 59            |
| Mean (SD)            | 135.8 (71.1) | 163.8 (121.1) | 189.5 (127.5) |

QD, daily; SD, standard deviation.
